# Supplementary material for: Carbon-incorporated NiO/Co3O4 concave surface microcubes derived from a MOF precursor for overall water splitting
Source: Royal Society of Chemistry journal article supplement (doi:10.1039/c9cc02037c), 2019-01-01
Supplement: c9cc02037c1.pdf [file c9cc02037c1.pdf]

*Electronic Supplementary Information (ESI)*

Carbon-incorporated NiO/Co<sub>3</sub>O<sub>4</sub> concave surface microcubes derived  
from a MOF precursor for overall water splitting

Xijun Wei,<sup>a</sup> Yunhuai Zhang<sup>\*a</sup>, Huichao He<sup>\*b</sup>, Di Gao,<sup>a</sup> Jingrui Hu,<sup>c</sup> Huarong Peng,<sup>a</sup> Li Peng,<sup>c</sup>

Shenghuan Xiao,<sup>a</sup> and Peng Xiao<sup>a,c</sup>

<sup>a</sup> *College of Chemistry and Chemical Engineering, Chongqing University, Chongqing 400044, China*

<sup>b</sup> *State Key Laboratory of Environmental Friendly Energy Materials, School of Materials Science and Engineering, Southwest University of Science and Technology, Mianyang, Sichuan, 621010, China*

<sup>c</sup> *College of Physics, Chongqing University, Chongqing 400044, China*

**Experimental details**

## Chemicals and reagents

All the chemicals and reagents used in the experiment were of analytical grade and used without further purification. The  $\text{Ni}(\text{NO}_3)_2 \cdot 6\text{H}_2\text{O}$ ,  $\text{K}_3[\text{Co}(\text{CN})_6]$ ,  $\text{KOH}$  and  $\text{Na}_3\text{C}_6\text{H}_5\text{O}_7 \cdot 2\text{H}_2\text{O}$  were all obtained from ShangHai Aladdin Biological Technology Co., Ltd.(ShangHai, China).

## Synthesis process

### Synthesis of $\text{Ni}_3[\text{Co}(\text{CN})_6]_2$ precursors and carbon-incorporated $\text{NiO}/\text{Co}_3\text{O}_4$ microcubes (NCMC)

In a typical procedure, 1.3 g of sodium citrate and 0.8 g of nickel nitrate were dissolved in 20 mL of deionized water (DIW) to form solution A. 1.6 g of potassium hexacyanocobaltate (III) was dissolved in 20 mL of DIW to form solution B. Then, solutions A and B were mixed under magnetic stirring for 5 min. The obtained mixed solution was aged for 24 h at room temperature. After collected by centrifugation and washed with water and ethanol, the precipitates were dried at 70°C overnight. For the synthesis of carbon-incorporated  $\text{NiO}/\text{Co}_3\text{O}_4$  microcubes, we directly annealed the as-obtained precursors at 300 °C for 1 h and 450 °C for 2 h in air at a heating rate of 2 °C  $\text{min}^{-1}$ .

## Characterization

The morphologies of the samples were observed by field-emission scanning electron microscopy (FESEM, JSM-7800F) and transmission electron microscopy (TEM, JEOL-2100F). Energy dispersive spectrometer (EDS) mapping was used to further analyse the elemental compositions of the samples. The phases and crystal structures of the materials were characterized using the powder X-ray diffraction (XRD, Bruker D8 Advance X-ray diffractometer,  $\text{Co K}\alpha$  radiation,  $\lambda=1.7902 \text{ \AA}$ ). X-ray photoelectron spectroscopy (XPS) analyze was conducted on a VG ESCALAB MKII spectrometer using an  $\text{Mg K}\alpha$  X-ray source (1253.6 eV, 120 W) at a constant analyzer.

### Electrochemical measurements

The relevant electrochemical measurements were performed on a CHI 660E Electrochemical Workstation (Shanghai CH660E Instruments, China). Linear sweep voltammetry (LSV) method was performed in 1.0 M KOH solution in a standard three-electrode system at a scan rate of 5 mV s<sup>-1</sup> with a graphite rod and a Ag/AgCl (Sat. KCl) electrode served as the counter and reference electrodes, respectively. The working electrodes were prepared by mixing the 5 mg active material (NCMC, Pt/C and RuO<sub>2</sub>), 0.44 mL of ethanol, 0.5 mL of DIW and 60 μL of 0.5 wt.% Nafion solution by ultrasonication for at least 0.5 h and 0.4 μL of the slurry was coated onto the surface of a carbon fiber paper electrode and then dried at ambient temperature. The mass loading of each electrode is around 0.28 mg cm<sup>-2</sup> on the carbon fiber paper. Potentials were referenced to a reversible hydrogen electrode (RHE):  $E(\text{RHE}) = E(\text{Ag/AgCl}) + (0.2 + 0.059 \text{ pH})\text{V}$ . The long-term stability tests were performed by a continuous current density of 10 mA cm<sup>-2</sup> was used. All the data presented were corrected for iR losses and carried out at ambient temperature.

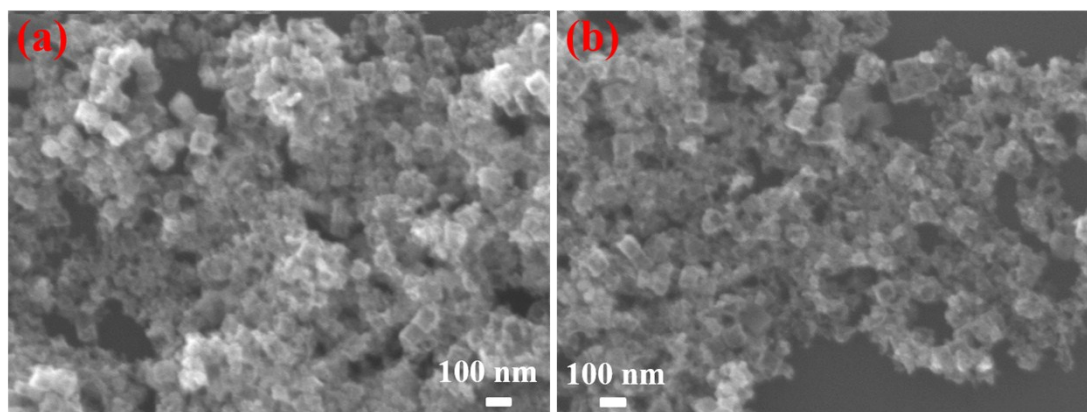

**Figure S1.** (a), (b) SEM images of the NCMC after stability test for OER and HER, respectively.

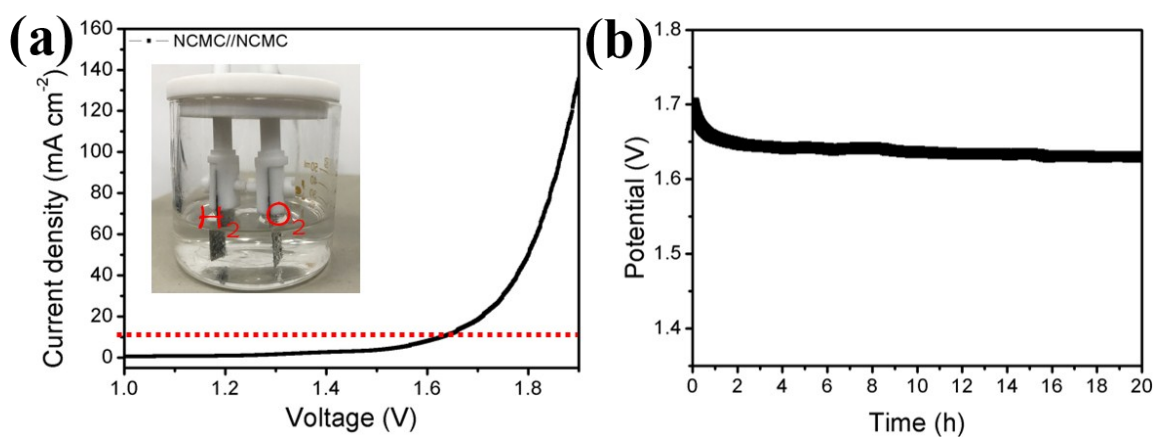

**Figure S2.** (a) Polarization curve of water electrolysis using NCMC as both OER and HER electrocatalysts in a two-electrode configuration. Inset: Optical photograph showing the generation of  $\text{H}_2$  and  $\text{O}_2$  bubbles on the NCMC. b) Chronopotentiometric curve of the NCMC for overall water splitting in a two-electrode configuration at  $10 \text{ mA cm}^{-2}$  in 1 M KOH.

**Table S1** Summary of various non-precious metal-based catalysts for OER.

| <b>Catalysts</b>                                               | <b>Overpotential (mV)<br/>at 10 mA cm<sup>-2</sup></b> | <b>Reference</b>                                   |
|----------------------------------------------------------------|--------------------------------------------------------|----------------------------------------------------|
| Fe <sub>2</sub> O <sub>3</sub> /CNT                            | 410                                                    | Electrochimica Acta., <b>2016</b> , 222, 1316–1325 |
| CoP/rGO hybrids                                                | 340                                                    | <i>Chem. Sci.</i> <b>2016</b> , 7, 1690            |
| γ-Fe <sub>2</sub> O <sub>3</sub> /CNTs                         | 340                                                    | J. Mater. Chem. A, <b>2016</b> , 4, 5216           |
| NiCoP/C nanoboxes                                              | 330                                                    | Angew. Chem. Int. Ed. <b>2017</b> , 56, 3897–3900  |
| M-Co <sub>3</sub> O <sub>4</sub> /NPC                          | 300                                                    | Nano-Micro Lett. <b>2018</b> , 10:15               |
| Co <sub>3</sub> O <sub>4</sub> /CoMoO <sub>4</sub>             | 318                                                    | J. Mater. Chem. A, <b>2018</b> , 6, 1639           |
| Co <sub>3</sub> O <sub>4</sub> /Fe <sub>2</sub> O <sub>3</sub> | 310                                                    | Chem. Eng. J. <b>2019</b> , 355, 336-340           |
| <b>NCMC</b>                                                    | <b>290</b>                                             | <b>This work</b>                                   |

**Table S2** Summary of various non-precious metal-based catalysts for HER.

| <b>Catalysts</b>                                           | <b>Overpotential (mV)<br/>at -10 mA cm<sup>-2</sup></b> | <b>Reference</b>                                            |
|------------------------------------------------------------|---------------------------------------------------------|-------------------------------------------------------------|
| Co <sub>9</sub> S <sub>8</sub> @MoS <sub>2</sub>           | 430                                                     | Adv. Mater. <b>2015</b> , 27, 4752                          |
| Co-CoO <sub>x</sub> /CN                                    | 260                                                     | J. Am. Chem. Soc. <b>2015</b> , 137, 2688                   |
| CoNi <sub>2</sub> Se <sub>4</sub>                          | 220                                                     | Chem. Commun. <b>2017</b> , 53, 5412                        |
| NCNT/Co-Fe-CoFe <sub>2</sub> O <sub>4</sub>                | 204                                                     | ACS Appl. Mater. Interfaces.<br>DOI: 10.1021/acsami.8b15612 |
| NS-MnO <sub>2</sub>                                        | 197                                                     | Adv. Energy Mater. <b>2017</b> , 7, 1700005                 |
| Ni <sub>0.9</sub> Fe <sub>0.1</sub> PS <sub>3</sub> @MXene | 196                                                     | Adv. Energy Mater. <b>2018</b> , 1801127                    |
| CoO                                                        | 191.5                                                   | ACS Nano. <b>2016</b> , 10, 8738-8745                       |
| <b>NCMC</b>                                                | <b>169.5</b>                                            | <b>This work</b>                                            |
